# Supplementary material for: Bioinspired seeding of biomaterials using three dimensional microtissues induces chondrogenic stem cell differentiation and cartilage formation under growth factor free conditions
Source: PubMed Central journal article supplement (PMC5093556; doi:10.1038/srep36011), 2016-11-03
Supplement: srep36011-s1.pdf [file srep36011-s1.pdf]

## SUPPLEMENTARY INFORMATION

**Bioinspired seeding of biomaterials using three dimensional microtissues induces chondrogenic stem cell differentiation and cartilage formation under growth factor free conditions**

### AUTHORS:

J. Leijten<sup>1,2,3,\*</sup>, L.S. Moreira Teixeira<sup>1,2,\*</sup>, J. Bolander<sup>1,2,\*</sup>, W. Ji<sup>1,2</sup>, B. Vanspauwen<sup>4</sup>, J. Lammertyn<sup>4</sup>, J. Schrooten<sup>1,2</sup> and F.P. Luyten<sup>1,2,#</sup>

### SUPPLEMENTAL FIGURES

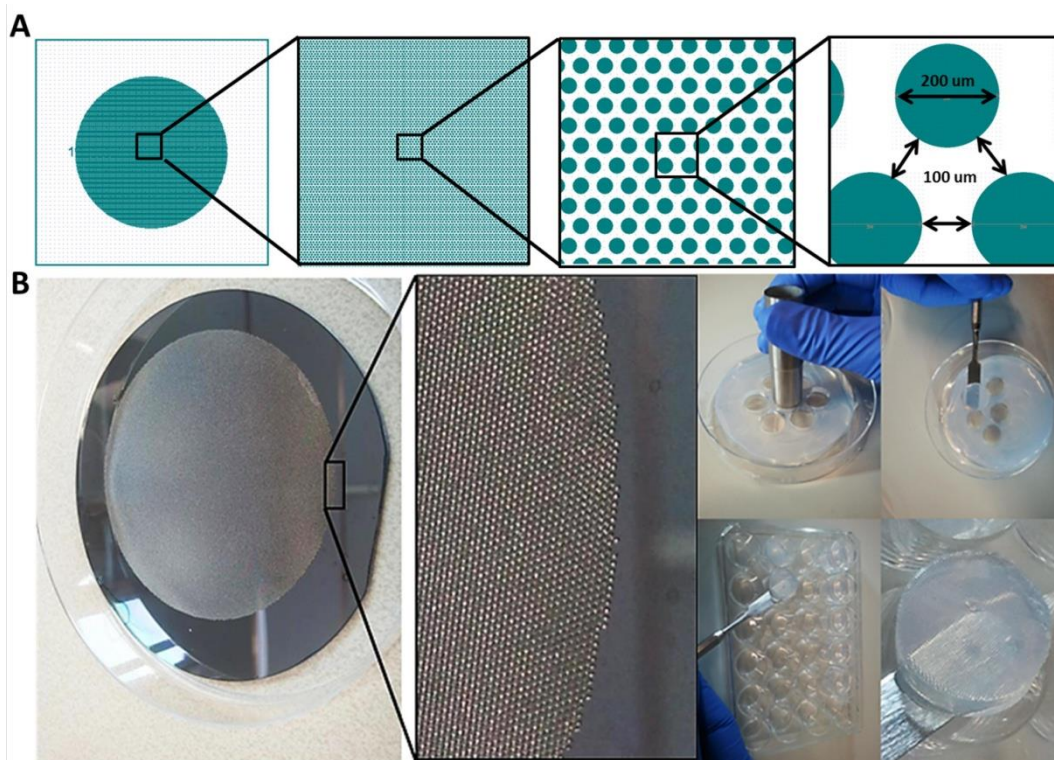

**Supplemental figure 1.** Design and fabrication of microaggregate forming agarose microwells.

(A) A photomask was designed containing a circular array of 125.000 circular spots. Each spot has a radius of 200 micrometer and is spaced minimally 100 micrometer from each other spot.

(B) The patterned silicon wafer was used to create 3% agarose negative copies. Using a sterile biopsy punches microwell inserts were cut to tightly fit into 24 well culture plates.

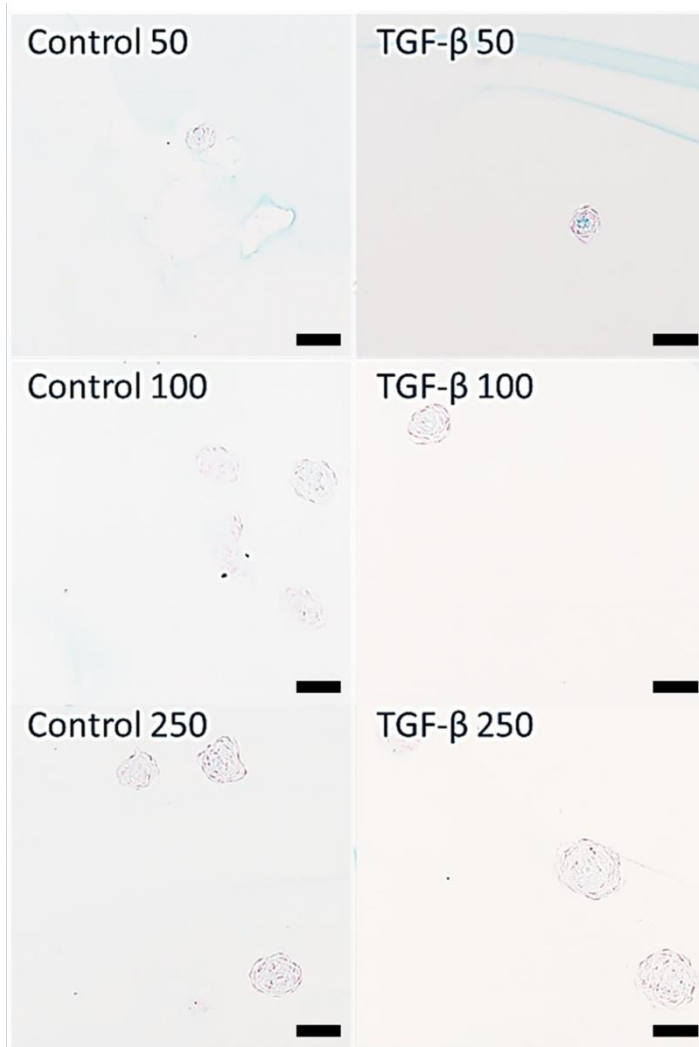

**Supplemental figure 2.** Implanted constructs did not demonstrate detectable levels of glycosaminoglycan. Prior to implantation, hPDC were cultured in vitro as single cells or microaggregate supplemented with 10 ng/ml of TGF $\beta$  for 6 days. Specimen were fixated and histologically analyzed on glycosaminoglycan deposition using Alcian blue staining. Scale bars equal 200  $\mu$ m.
